# Supplementary material for: Evaluation of Age and Sex-Related Metabolic Changes in Healthy Subjects: An Italian Brain 18F-FDG PET Study
Source: MDPI journal article supplement (doi:10.3390/jcm10214932), 2021-10-25
Supplement: s1 [file s1]

**Table S1.** Clusters of significant correlation between age and metabolic activity in female (A) and male (M) subjects, resulting from SPM analysis.

**A.**

| Cluster<br>FEMALE | <i>p</i> (FWE-corr)<br>Cluster-level | <i>k<sub>E</sub></i> | <i>p</i> (FWE-corr)<br>Voxel-level | T        | x   | y   | z   | Anatomical Location |                |                     |    |           |
|-------------------|--------------------------------------|----------------------|------------------------------------|----------|-----|-----|-----|---------------------|----------------|---------------------|----|-----------|
| 1                 | 0.00E+00                             | 5707                 | 0.00E+00                           | 1.23E+01 | -16 | -12 | -16 | L                   | Limbic Lobe    | Parahipp Gyrus      | GM | BA 28     |
|                   |                                      |                      | 1.36E-11                           | 1.02E+01 | 0   | -16 | 0   | L                   | Sub-lobar      | Thalamus            | GM | *         |
|                   |                                      |                      | 2.14E-11                           | 1.01E+01 | -6  | 14  | 2   | L                   | Sub-lobar      | Caudate             | GM | Caud Body |
| 2                 | 0.00E+00                             | 2124                 | 2.07E-09                           | 8.99E+00 | -44 | 4   | -2  | L                   | Sub-lobar      | Insula              | GM | BA 13     |
|                   |                                      |                      | 1.26E-07                           | 8.03E+00 | -36 | 18  | -8  | L                   | Sub-lobar      | Insula              | GM | BA 13     |
|                   |                                      |                      | 4.70E-07                           | 7.71E+00 | -42 | -16 | 8   | L                   | Sub-lobar      | Insula              | GM | BA 13     |
| 3                 | 0.00E+00                             | 1537                 | 6.95E-08                           | 8.17E+00 | 40  | 12  | -18 | R                   | Sub-lobar      | Extra-Nuclear       | GM | BA 13     |
|                   |                                      |                      | 1.82E-06                           | 7.39E+00 | 42  | 16  | 0   | R                   | Sub-lobar      | Insula              | GM | BA 13     |
|                   |                                      |                      | 3.93E-06                           | 7.20E+00 | 36  | 18  | -10 | R                   | Sub-lobar      | Insula              | GM | BA 13     |
| 4                 | 2.93E-09                             | 398                  | 1.92E-05                           | 6.81E+00 | 6   | -92 | 0   | R                   | Occipital Lobe | Lingual Gyrus       | GM | BA 18     |
|                   |                                      |                      | 1.11E-04                           | 6.37E+00 | 0   | -74 | 4   | L                   | Occipital Lobe | Lingual Gyrus       | GM | BA 18     |
|                   |                                      |                      | 1.52E-04                           | 6.29E+00 | 0   | -64 | 14  | L                   | Limbic Lobe    | Posterior Cingulate | GM | BA 30     |
| 5                 | 1.52E-05                             | 75                   | 2.06E-05                           | 6.80E+00 | -54 | -34 | 0   | L                   | Temporal Lobe  | Mid Temporal Gyr.   | GM | *         |
| 6                 | 3.92E-05                             | 51                   | 1.39E-04                           | 6.32E+00 | -32 | -46 | 48  | L                   | Parietal Lobe  | Inf Parietal Lobule | GM | BA 40     |

**B.**

| Cluster<br>MALE | <i>p</i> (FWE-corr)<br>Cluster-level | <i>k<sub>E</sub></i> | <i>p</i> (FWE-corr)<br>Voxel-level | T        | x   | y   | z   | Anatomical Location |             |                    |    |           |
|-----------------|--------------------------------------|----------------------|------------------------------------|----------|-----|-----|-----|---------------------|-------------|--------------------|----|-----------|
| 1               | 3.80E-08                             | 224                  | 1.76E-06                           | 7.77E+00 | -20 | -20 | -12 | L                   | Limbic Lobe | Parahipp Gyrus     | GM | BA 35     |
|                 |                                      |                      | 1.32E-05                           | 7.23E+00 | -16 | -12 | -16 | L                   | Limbic Lobe | Parahipp Gyrus     | GM | BA 28     |
|                 |                                      |                      | 1.02E-04                           | 6.67E+00 | -20 | 0   | -18 | L                   | Limbic Lobe | Parahipp Gyrus     | GM | BA 34     |
| 2               | 5.52E-13                             | 679                  | 2.21E-06                           | 7.71E+00 | -40 | 8   | -14 | L                   | Sub-lobar   | Extra-Nuclear      | GM | BA 13     |
|                 |                                      |                      | 2.96E-06                           | 7.63E+00 | -42 | -6  | -4  | L                   | Sub-lobar   | Insula             | GM | BA 13     |
|                 |                                      |                      | 6.93E-05                           | 6.77E+00 | -40 | -2  | 8   | L                   | Sub-lobar   | Insula             | GM | BA 13     |
| 3               | 0.00E+00                             | 1177                 | 3.89E-06                           | 7.56E+00 | 2   | 40  | 8   | L                   | Limbic Lobe | Anterior Cingulate | GM | BA 24     |
|                 |                                      |                      | 2.08E-05                           | 7.10E+00 | 2   | 18  | 32  | L                   | Limbic Lobe | Cingulate Gyrus    | GM | BA 24     |
| 4               | 7.90E-14                             | 774                  | 9.12E-06                           | 7.33E+00 | 40  | 8   | 2   | R                   | Sub-lobar   | Insula             | WM | *         |
|                 |                                      |                      | 1.39E-05                           | 7.21E+00 | 44  | -2  | -8  | R                   | Sub-lobar   | Insula             | GM | BA 13     |
|                 |                                      |                      | 1.89E-05                           | 7.13E+00 | 40  | -12 | 2   | R                   | Sub-lobar   | Extra-Nuclear      | WM | *         |
| 5               | 1.06E-05                             | 67                   | 2.06E-05                           | 7.11E+00 | 2   | -24 | 8   | L                   | Sub-lobar   | Thalamus           | GM | *         |
| 6               | 1.43E-08                             | 257                  | 2.11E-05                           | 7.10E+00 | -2  | 14  | -4  | L                   | Sub-lobar   | Caudate            | GM | CaudHead  |
|                 |                                      | 51                   | 1.30E-04                           | 6.60E+00 | 8   | 8   | 8   | R                   | Sub-lobar   | Caudate            | GM | Caud Body |
|                 |                                      |                      | 3.16E-04                           | 6.35E+00 | 2   | 24  | -16 | R                   | Limbic Lobe | Anterior Cingulate |    | BA 24     |

**Table S2.** Significant ( $p < 0.0001$ ) negative correlation between age and 18F-FDG uptake value resulting by SPSS (Statistical Package for Social Science) analyses, using white matter (A, B) and pons (C, D) 18F-FDG activity as normalization reference in anatomical regions (A, C) and Brodmann areas (B, D).

**A.**

| Anat. ROI/WM | r      | Anat. ROI/WM    | r      | Anat. ROI/WM    | r      |
|--------------|--------|-----------------|--------|-----------------|--------|
| insula L     | -0.584 | paraHipp L      | -0.399 | cing-mid R      | -0.327 |
| insula R     | -0.563 | FRmed-orb L     | -0.395 | parietal-inf L  | -0.315 |
| cing-ant L   | -0.531 | rectus R        | -0.393 | cing-mid L      | -0.308 |
| caudato L    | -0.516 | FRinf-oper R    | -0.391 | parietal-inf R  | -0.301 |
| olfactory L  | -0.506 | FRsup-medial L  | -0.387 | rolandic-oper L | -0.292 |
| olfactory R  | -0.497 | FRmed-orb R     | -0.383 | FRsup-medial R  | -0.287 |
| cing-ant R   | -0.460 | FRinf-oper L    | -0.371 | cing-post L     | -0.285 |
| heschl R     | -0.443 | lingual R       | -0.362 | hippocamp R     | -0.284 |
| caudato R    | -0.417 | paraHipp R      | -0.332 | lingual L       | -0.284 |
| rectus L     | -0.415 | temp-pole sup L | -0.332 | FRinf-tri L     | -0.28  |
| heschl L     | -0.405 | hipocamp L      | -0.329 |                 |        |

ROI = region of interest; r = Pearson coefficient; WM = white matter; P = pons; BA = Brodmann area.

**B.**

| BA ROI/WM | r      | BA ROI/WM | r      | BA ROI/WM | r      |
|-----------|--------|-----------|--------|-----------|--------|
| BAR13     | -0.574 | BAR34     | -0.401 | BAL35     | -0.339 |
| BAR25     | -0.562 | BAR24     | -0.399 | BAR28     | -0.327 |
| BAL25     | -0.557 | BAR17     | -0.398 | BAR18     | -0.316 |
| BAL13     | -0.544 | BAR33     | -0.397 | BAR35     | -0.314 |
| BAL34     | -0.467 | BAL24     | -0.396 | BAL9      | -0.306 |
| BAR32     | -0.455 | BAL28     | -0.395 | BAR31     | -0.298 |
| BAL32     | -0.442 | BAL33     | -0.378 | BAR11     | -0.295 |
| BAR41     | -0.421 | BAL29     | -0.376 | BAR29     | -0.291 |
| BAL27     | -0.418 | BAL30     | -0.365 | BAL41     | -0.286 |
| BAR27     | -0.413 | BAR30     | -0.357 | BAR9      | -0.286 |
| BAL23     | -0.412 | BAL47     | -0.355 | BAL11     | -0.281 |
| BAR23     | -0.404 | BAR47     | -0.340 |           |        |

ROI = region of interest; r = Pearson coefficient; WM = white matter; P = pons; BA = Brodmann area.

**C.**

| Anat. ROI/P  | r      | Anat. ROI/P     | r      | Anat. ROI/P     | r      |
|--------------|--------|-----------------|--------|-----------------|--------|
| insula R     | -0.597 | temp-pole sup L | -0.447 | FRinf-orb L     | -0.342 |
| insula L     | -0.579 | parietal-inf L  | -0.444 | FRinf-tri r     | -0.341 |
| caudato L    | -0.576 | FRmed-orb R     | -0.443 | cing-post R     | -0.339 |
| cing-ant L   | -0.556 | hippocamp R     | -0.435 | temporal-mid R  | -0.337 |
| paraHipp L   | -0.554 | cing-mid R      | -0.428 | amigdala R      | -0.333 |
| olfactory L  | -0.535 | cing-mid L      | -0.428 | FRsup-orb R     | -0.327 |
| olfactory R  | -0.513 | parietal-inf R  | -0.418 | fusiform L      | -0.326 |
| cing-ant R   | -0.494 | FRinf-tri L     | -0.394 | supMotor area L | -0.326 |
| FRinf-oper L | -0.493 | rolandic-oper L | -0.394 | FRinf-orb R     | -0.324 |
| rectus L     | -0.488 | temporal sup L  | -0.391 | fusiform R      | -0.322 |
| heschl R     | -0.486 | FRsup-medial R  | -0.388 | precuneo L      | -0.316 |
| FRinf-oper R | -0.485 | cing-post L     | -0.385 | FRmid R         | -0.311 |

|                |        |                 |        |                 |        |
|----------------|--------|-----------------|--------|-----------------|--------|
| FRsup-medial L | -0.483 | angular R       | -0.371 | supMarginal L   | -0.31  |
| heschl L       | -0.475 | temporal-mid L  | -0.37  | talamo L        | -0.309 |
| caudato R      | -0.473 | lingual L       | -0.368 | temporal-inf L  | -0.298 |
| hipocamp L     | -0.468 | FRsup R         | -0.368 | precentral L    | -0.298 |
| paraHipp R     | -0.465 | FRsup L         | -0.359 | supMarginal R   | -0.291 |
| FRmed-orb L    | -0.465 | FRsup-orb L     | -0.358 | temp-pole sup R | -0.288 |
| rectus R       | -0.456 | temporal sup R  | -0.354 | occipital-sup R | -0.282 |
| amigdala L     | -0.451 | rolandic-oper R | -0.351 |                 |        |
| lingual R      | -0.447 | FRmid L         | -0.343 |                 |        |

ROI = region of interest; r = Pearson coefficient; WM = white matter; P = pons; BA = Brodmann area.

**D.**

| <b>BA ROI/P</b> | <b>r</b> | <b>BA ROI/P</b> | <b>r</b> | <b>BA RO/P</b> | <b>r</b> |
|-----------------|----------|-----------------|----------|----------------|----------|
| BAL34           | -0.622   | BAL47           | -0.462   | BAL10          | -0.37    |
| BAR25           | -0.588   | BAL29           | -0.454   | BAL38          | -0.359   |
| BAL25           | -0.587   | BAL33           | -0.45    | BAR10          | -0.355   |
| BAL27           | -0.567   | BAR47           | -0.447   | BAL8           | -0.339   |
| BAL28           | -0.555   | BAL30           | -0.441   | BAR8           | -0.337   |
| BAR34           | -0.554   | BAR18           | -0.426   | BAR22          | -0.332   |
| BAR27           | -0.546   | BAL9            | -0.423   | BAL21          | -0.331   |
| BAR13           | -0.545   | BAR30           | -0.423   | BAL18          | -0.328   |
| BAL13           | -0.543   | BAR31           | -0.406   | BAR37          | -0.326   |
| BAL35           | -0.518   | BAR9            | -0.397   | BAL45          | -0.325   |
| BAR32           | -0.506   | BAL44           | -0.39    | BAL17          | -0.319   |
| BAR35           | -0.502   | BAR36           | -0.387   | BAR2           | -0.318   |
| BAR28           | -0.501   | BAL36           | -0.387   | BAR7           | -0.318   |
| BAL23           | -0.496   | BAL11           | -0.383   | BAR38          | -0.315   |
| BAR41           | -0.492   | BAL31           | -0.381   | BAR45          | -0.315   |
| BAL24           | -0.488   | BAR11           | -0.381   | BAR21          | -0.3     |
| BAL32           | -0.486   | BAR44           | -0.38    | BAL7           | -0.297   |
| BAR24           | -0.483   | BAR29           | -0.378   | BAR20          | -0.287   |
| BAR17           | -0.481   | BAL41           | -0.377   | BAL2           | -0.285   |
| BAR23           | -0.473   | BAL40           | -0.371   | BAR19          | -0.28    |
| BAR33           | -0.468   | BAL22           | -0.371   | BAL37          | -0.28    |

ROI = region of interest; r = Pearson coefficient; WM = white matter; P = pons; BA = Brodmann area.
